# Supplementary material for: Mesenchymal stem cells and their application to rotator cuff pathology: A meta-analysis of pre-clinical studies
Source: PubMed Central journal article supplement — Osteoarthr Cartil Open. 2020 Feb 26;2(2):100047. doi: 10.1016/j.ocarto.2020.100047 (PMC9718136; doi:10.1016/j.ocarto.2020.100047), 2020-02-26
Supplement: mmc2.pdf [file mmc2.pdf]

# 1 Supplementary Table 2: SYRCLE Protocol

| 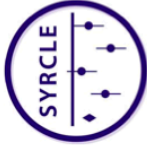 <b>Systematic Review Protocol for Animal Intervention Studies</b><br>Format by SYRCLE ( <a href="http://www.syrcle.nl">www.syrcle.nl</a> )<br>Version 2.0 (December 2014) |                                                                                                     |                                                                                                                                                                                                                                                                                                                                                                                                            |                    |
|-------------------------------------------------------------------------------------------------------------------------------------------------------------------------------------------------------------------------------------------------------------|-----------------------------------------------------------------------------------------------------|------------------------------------------------------------------------------------------------------------------------------------------------------------------------------------------------------------------------------------------------------------------------------------------------------------------------------------------------------------------------------------------------------------|--------------------|
| Item #                                                                                                                                                                                                                                                      | Section/Subsection/Item                                                                             | Description                                                                                                                                                                                                                                                                                                                                                                                                | Check for approval |
| <b>A. General</b>                                                                                                                                                                                                                                           |                                                                                                     |                                                                                                                                                                                                                                                                                                                                                                                                            |                    |
| 1.                                                                                                                                                                                                                                                          | Title of the review                                                                                 | Mesenchymal stem cells and their application to rotator cuff pathology: a meta-analysis of pre-clinical animal and human studies                                                                                                                                                                                                                                                                           |                    |
| 2.                                                                                                                                                                                                                                                          | Authors (names, affiliations, contributions)                                                        | Nicolas Morton-Gonzaba<br>Daniel Carlisle<br>Kevin Chorath<br>Alvaro Moreira                                                                                                                                                                                                                                                                                                                               |                    |
| 3.                                                                                                                                                                                                                                                          | Other contributors (names, affiliations, contributions)                                             |                                                                                                                                                                                                                                                                                                                                                                                                            |                    |
| 4.                                                                                                                                                                                                                                                          | Contact person + e-mail address                                                                     | Alvaro Moreira: moreiraa@uthscsa.edu                                                                                                                                                                                                                                                                                                                                                                       |                    |
| 5.                                                                                                                                                                                                                                                          | Funding sources/sponsors                                                                            | None                                                                                                                                                                                                                                                                                                                                                                                                       |                    |
| 6.                                                                                                                                                                                                                                                          | Conflicts of interest                                                                               | None                                                                                                                                                                                                                                                                                                                                                                                                       |                    |
| 7.                                                                                                                                                                                                                                                          | Date and location of protocol registration                                                          | CAMARADES                                                                                                                                                                                                                                                                                                                                                                                                  |                    |
| 8.                                                                                                                                                                                                                                                          | Registration number (if applicable)                                                                 | N/A                                                                                                                                                                                                                                                                                                                                                                                                        |                    |
| 9.                                                                                                                                                                                                                                                          | Stage of review at time of registration                                                             | Preliminary searches<br>Piloting study selection<br>Formal screening with final search criteria                                                                                                                                                                                                                                                                                                            |                    |
| <b>B. Objectives</b>                                                                                                                                                                                                                                        |                                                                                                     |                                                                                                                                                                                                                                                                                                                                                                                                            |                    |
| <b>Background</b>                                                                                                                                                                                                                                           |                                                                                                     |                                                                                                                                                                                                                                                                                                                                                                                                            |                    |
| 10.                                                                                                                                                                                                                                                         | What is already known about this disease/model/intervention? Why is it important to do this review? | Rotator cuff tendon tears are the most common tendon injury in adults. Although surgical tendon repair is one of the most common orthopaedic interventions, surgical failure varies from 20% to 90%. In lieu of their application to various disease/injury processes and the research being conducted, mesenchymal stem cell therapy is an attractive alternative to overcome current treatment deficits. |                    |
| <b>Research question</b>                                                                                                                                                                                                                                    |                                                                                                     |                                                                                                                                                                                                                                                                                                                                                                                                            |                    |

|                                                              |                                                                                                                                                                                                                                                                                                                                                                                                                                                                                                                                                                                                                                                                                                                                                            |                                                                                                                                                                                                                                                                                                                                                                    |  |
|--------------------------------------------------------------|------------------------------------------------------------------------------------------------------------------------------------------------------------------------------------------------------------------------------------------------------------------------------------------------------------------------------------------------------------------------------------------------------------------------------------------------------------------------------------------------------------------------------------------------------------------------------------------------------------------------------------------------------------------------------------------------------------------------------------------------------------|--------------------------------------------------------------------------------------------------------------------------------------------------------------------------------------------------------------------------------------------------------------------------------------------------------------------------------------------------------------------|--|
|                                                              | <p><a href="http://www.ncbi.nlm.nih.gov/pmc/articles/PMC3265183/pdf/LA-11-087.pdf">"http://www.ncbi.nlm.nih.gov/pmc/articles/PMC3265183/pdf/LA-11-087.pdf"</a> and animal search filters<sup>2</sup> <a href="http://www.ncbi.nlm.nih.gov/pmc/articles/PMC3104815/pdf/LA-09-117.pdf">HYPERLINK</a></p> <p><a href="http://www.ncbi.nlm.nih.gov/pmc/articles/PMC3104815/pdf/LA-09-117.pdf">"http://www.ncbi.nlm.nih.gov/pmc/articles/PMC3104815/pdf/LA-09-117.pdf"</a><sup>0</sup> <a href="http://www.ncbi.nlm.nih.gov/pmc/articles/PMC3104815/pdf/LA-09-117.pdf">HYPERLINK</a></p> <p><a href="http://www.ncbi.nlm.nih.gov/pmc/articles/PMC3104815/pdf/LA-09-117.pdf">"http://www.ncbi.nlm.nih.gov/pmc/articles/PMC3104815/pdf/LA-09-117.pdf"</a>, 21</p> |                                                                                                                                                                                                                                                                                                                                                                    |  |
| 19.                                                          | Identify other sources for study identification                                                                                                                                                                                                                                                                                                                                                                                                                                                                                                                                                                                                                                                                                                            | <input checked="" type="checkbox"/> Reference lists of included studies<br><input type="checkbox"/> Books<br><input checked="" type="checkbox"/> Reference lists of relevant reviews<br><input type="checkbox"/> Conference proceedings, namely:<br><input type="checkbox"/> Contacting authors/ organisations, namely:<br><input type="checkbox"/> Other, namely: |  |
| 20.                                                          | Define search strategy for these other sources                                                                                                                                                                                                                                                                                                                                                                                                                                                                                                                                                                                                                                                                                                             | Screening the reference lists for relevant titles and screening the abstracts of these relevant titles                                                                                                                                                                                                                                                             |  |
| <b>Study selection</b>                                       |                                                                                                                                                                                                                                                                                                                                                                                                                                                                                                                                                                                                                                                                                                                                                            |                                                                                                                                                                                                                                                                                                                                                                    |  |
| 21.                                                          | Define screening phases (e.g. pre-screening based on title/abstract, full text screening, both)                                                                                                                                                                                                                                                                                                                                                                                                                                                                                                                                                                                                                                                            | First phase screening based on title and abstract<br>Second phase full-text screening of the eligible articles                                                                                                                                                                                                                                                     |  |
| 22.                                                          | Specify (a) the number of reviewers per screening phase and (b) how discrepancies will be resolved                                                                                                                                                                                                                                                                                                                                                                                                                                                                                                                                                                                                                                                         | Two investigators (N. Morton-Gonzaba and D. Carlisle) will independently screen all the abstracts/full texts for the inclusion criteria. Differences of opinion in either phase that cannot be resolved by discussion will be resolved by consulting a third investigator (A. Moreira).                                                                            |  |
| <i>Define all inclusion and exclusion criteria based on:</i> |                                                                                                                                                                                                                                                                                                                                                                                                                                                                                                                                                                                                                                                                                                                                                            |                                                                                                                                                                                                                                                                                                                                                                    |  |
| 23.                                                          | Type of study (design)                                                                                                                                                                                                                                                                                                                                                                                                                                                                                                                                                                                                                                                                                                                                     | <u>Inclusion criteria:</u><br>Animal intervention studies (with control group) regardless of the methodological quality;<br>Human clinical trials-any phase<br><u>Exclusion criteria:</u> Non-intervention studies, no control group                                                                                                                               |  |
| 24.                                                          | Type of animals/population (e.g. age, gender, disease model)                                                                                                                                                                                                                                                                                                                                                                                                                                                                                                                                                                                                                                                                                               | <u>Inclusion criteria:</u><br>Animal models of experimental rotator cuff injury<br>Humans (all ages) with rotator cuff injury                                                                                                                                                                                                                                      |  |

|                                                                                                       |                                                                            |                                                                                                                                                                                                                                                                                                                                         |  |
|-------------------------------------------------------------------------------------------------------|----------------------------------------------------------------------------|-----------------------------------------------------------------------------------------------------------------------------------------------------------------------------------------------------------------------------------------------------------------------------------------------------------------------------------------|--|
|                                                                                                       |                                                                            | <u>Exclusion criteria:</u><br>In vitro                                                                                                                                                                                                                                                                                                  |  |
| 25.                                                                                                   | Type of intervention (e.g. dosage, timing, frequency)                      | Administration of regenerative cells/<br>cell-free products– all dosages, timing,<br>delivery routes, and frequency                                                                                                                                                                                                                     |  |
| 26.                                                                                                   | Outcome measures                                                           | <u>Primary outcome:</u><br>Imaging (including, but not limited to:<br>x-ray, ultrasound,<br>CT/MRI) and/or<br>Range of motion<br><br><u>Secondary outcome:</u><br>Histologic/Microscopic analyses of<br>wound healing<br>Gene/protein expression<br>inflammation, fibrosis,<br>angiogenesis, wound healing<br>Safety, Long-term outcome |  |
| 27.                                                                                                   | Language restrictions                                                      | All languages will be included                                                                                                                                                                                                                                                                                                          |  |
| 28.                                                                                                   | Publication date restrictions                                              | <u>None</u>                                                                                                                                                                                                                                                                                                                             |  |
| 29.                                                                                                   | Other                                                                      | N/A                                                                                                                                                                                                                                                                                                                                     |  |
| 30.                                                                                                   | Sort and prioritize your exclusion criteria per selection phase            | Selection phase: title and abstract<br>screening<br>1. Not a primary study<br>2. Not an <i>in vivo</i> animal/human study<br>3. No rotator cuff injury<br>4. No regenerative cell or cell-free<br>product treatment<br>5. No animal control group                                                                                       |  |
| <b>Study characteristics to be extracted (for assessment of external validity, reporting quality)</b> |                                                                            |                                                                                                                                                                                                                                                                                                                                         |  |
| 31.                                                                                                   | Study ID (e.g. authors, year)                                              | Authors, journal, title, year, language,<br>contact author e-<br>mail                                                                                                                                                                                                                                                                   |  |
| 32.                                                                                                   | Study design characteristics (e.g. experimental groups, number of animals) | <u>Animal:</u> Number of animals in<br>experimental and control groups;<br>induction of rotator cuff injury<br><u>Human:</u> number, experimental groups,<br>inclusion/exclusion criteria                                                                                                                                               |  |
| 33.                                                                                                   | Animal model characteristics (e.g. species, gender, disease induction)     | <u>Animal:</u> species, strain, age, gender<br><u>Human:</u> age, gender                                                                                                                                                                                                                                                                |  |

|                                                              |                                                                                                                                                                                                                             |                                                                                                                                                                                                                                                                                                                                                                                                                                                                                                                                                                                                                                                                                                                                                                                                                                                                                           |  |
|--------------------------------------------------------------|-----------------------------------------------------------------------------------------------------------------------------------------------------------------------------------------------------------------------------|-------------------------------------------------------------------------------------------------------------------------------------------------------------------------------------------------------------------------------------------------------------------------------------------------------------------------------------------------------------------------------------------------------------------------------------------------------------------------------------------------------------------------------------------------------------------------------------------------------------------------------------------------------------------------------------------------------------------------------------------------------------------------------------------------------------------------------------------------------------------------------------------|--|
| 34.                                                          | Intervention characteristics ( <i>e.g.</i> intervention, timing, duration)                                                                                                                                                  | Source, dose, route of delivery, timing, and frequency of regenerative cells or cell-free product                                                                                                                                                                                                                                                                                                                                                                                                                                                                                                                                                                                                                                                                                                                                                                                         |  |
| 35.                                                          | Outcome measures                                                                                                                                                                                                            | Per primary and secondary outcomes of interest                                                                                                                                                                                                                                                                                                                                                                                                                                                                                                                                                                                                                                                                                                                                                                                                                                            |  |
| 36.                                                          | Other ( <i>e.g.</i> drop-outs)                                                                                                                                                                                              | Reason of exclusion                                                                                                                                                                                                                                                                                                                                                                                                                                                                                                                                                                                                                                                                                                                                                                                                                                                                       |  |
| Assessment risk of bias (internal validity) or study quality |                                                                                                                                                                                                                             |                                                                                                                                                                                                                                                                                                                                                                                                                                                                                                                                                                                                                                                                                                                                                                                                                                                                                           |  |
| 37.                                                          | Specify (a) the number of reviewers assessing the risk of bias/study quality in each study and (b) how discrepancies will be resolved                                                                                       | Two investigators (N. Morton-Gonzaba and D. Carlisle) will independently screen all the abstracts/full texts for the inclusion criteria. Differences of opinion in either phase that cannot be resolved by discussion will be resolved by consulting a third investigator (A. Moreira).                                                                                                                                                                                                                                                                                                                                                                                                                                                                                                                                                                                                   |  |
| 38.                                                          | Define criteria to assess (a) the internal validity of included studies ( <i>e.g.</i> selection, performance, detection and attrition bias) and/or (b) other study quality measures ( <i>e.g.</i> reporting quality, power) | <p>X By use of <a href="http://www.biomedcentral.com/1471-2288/14/43/abstract">SYRCLE's Risk of Bias tool</a> <small>HYPERLINK "http://www.biomedcentral.com/1471-2288/14/43/abstract"</small><sup>4</sup> <small>HYPERLINK "http://www.biomedcentral.com/1471-2288/14/43/abstract"</small></p> <p><input type="checkbox"/> By use of SYRCLE's Risk of Bias tool, adapted as follows:</p> <p><input type="checkbox"/> By use of <a href="http://www.ncbi.nlm.nih.gov/pubmed/15060322">CAMARADES' study quality checklist</a>, <small>HYPERLINK "http://www.ncbi.nlm.nih.gov/pubmed/15060322" e.g. HYPERLINK "http://www.ncbi.nlm.nih.gov/pubmed/15060322" HYPERLINK "http://www.ncbi.nlm.nih.gov/pubmed/15060322"22</small></p> <p><input type="checkbox"/> By use of CAMARADES' study quality checklist, adapted as follows:</p> <p><input type="checkbox"/> Other criteria, namely:</p> |  |
| Collection of outcome data                                   |                                                                                                                                                                                                                             |                                                                                                                                                                                                                                                                                                                                                                                                                                                                                                                                                                                                                                                                                                                                                                                                                                                                                           |  |
| 39.                                                          | For each outcome measure, define the type of data to be extracted ( <i>e.g.</i> continuous/dichotomous, unit of measurement)                                                                                                | <b>Primary/Secondary outcome:</b><br>continuous and/or categorical data                                                                                                                                                                                                                                                                                                                                                                                                                                                                                                                                                                                                                                                                                                                                                                                                                   |  |
| 40.                                                          | Methods for data extraction/retrieval ( <i>e.g.</i> first extraction from graphs using a digital screen ruler, then contacting authors)                                                                                     | Extraction from text, tables, and figures (GetData Graph Digitizer)<br>Contact authors in case of missing data                                                                                                                                                                                                                                                                                                                                                                                                                                                                                                                                                                                                                                                                                                                                                                            |  |
| 41.                                                          | Specify (a) the number of reviewers extracting data and (b) how discrepancies will be resolved                                                                                                                              | Two investigators (N. Morton-Gonzaba and D. Carlisle) will independently screen all the abstracts/full texts for the inclusion criteria. Differences of opinion in either phase that cannot be resolved                                                                                                                                                                                                                                                                                                                                                                                                                                                                                                                                                                                                                                                                                   |  |

|                                                                                        |                                                                                                                          |                                                                                                                                                                                                                                                                              |                    |
|----------------------------------------------------------------------------------------|--------------------------------------------------------------------------------------------------------------------------|------------------------------------------------------------------------------------------------------------------------------------------------------------------------------------------------------------------------------------------------------------------------------|--------------------|
|                                                                                        |                                                                                                                          | by discussion will be resolved by consulting a third investigator (A. Moreira).                                                                                                                                                                                              |                    |
| Data analysis/synthesis                                                                |                                                                                                                          |                                                                                                                                                                                                                                                                              |                    |
| 42.                                                                                    | Specify (per outcome measure) how you are planning to combine/compare the data (e.g. descriptive summary, meta-analysis) | If the outcome measures extracted from eligible studies are sufficient we will conduct meta analyses.                                                                                                                                                                        |                    |
| 43.                                                                                    | Specify (per outcome measure) how it will be decided whether a meta-analysis will be performed                           |                                                                                                                                                                                                                                                                              |                    |
| <i>If a meta-analysis seems feasible/sensible, specify (for each outcome measure):</i> |                                                                                                                          |                                                                                                                                                                                                                                                                              |                    |
| 44.                                                                                    | The effect measure to be used (e.g. mean difference, standardized mean difference, risk ratio, odds ratio)               | Continuous outcomes will be analysed using standardized mean differences (95% CI)                                                                                                                                                                                            |                    |
| 45.                                                                                    | The statistical model of analysis (e.g. random or fixed effects model)                                                   | Random-effects model                                                                                                                                                                                                                                                         |                    |
| 46.                                                                                    | The statistical methods to assess heterogeneity (e.g. $I^2$ , Q)                                                         | $I^2$                                                                                                                                                                                                                                                                        |                    |
| 47.                                                                                    | Which study characteristics will be examined as potential source of heterogeneity (subgroup analysis)                    | Meta-regression analyses will be performed to examine heterogeneity on outcomes including: animal/human age, sex, type and tissue source of regenerative cell or product, timing, frequency, dosing of administration, route of cell administration, use of co-interventions |                    |
| 48.                                                                                    | Any sensitivity analyses you propose to perform                                                                          |                                                                                                                                                                                                                                                                              |                    |
| 49.                                                                                    | Other details meta-analysis (e.g. correction for multiple testing, correction for multiple use of control group)         |                                                                                                                                                                                                                                                                              |                    |
| 50.                                                                                    | The method for assessment of publication bias                                                                            | Funnel plots and Egger's test                                                                                                                                                                                                                                                |                    |
|                                                                                        |                                                                                                                          |                                                                                                                                                                                                                                                                              |                    |
| Final approval by (names, affiliations):                                               |                                                                                                                          | Nicolas Morton-Gonzaba<br>Daniel Carlisle<br>Kevin Chorath<br>Alvaro Moreira<br><br>University of Texas Health San Antonio                                                                                                                                                   | Date: Feb 18, 2019 |
