# Supplementary material for: Mesenchymal stem cells and their application to rotator cuff pathology: A meta-analysis of pre-clinical studies
Source: PubMed Central journal article supplement — Osteoarthr Cartil Open. 2020 Feb 26;2(2):100047. doi: 10.1016/j.ocarto.2020.100047 (PMC9718136; doi:10.1016/j.ocarto.2020.100047), 2020-02-26
Supplement: mmc3.pdf [file mmc3.pdf]

1 **Supplementary Table 3: Literature Search Terms – A) Keywords; B) Database**

2

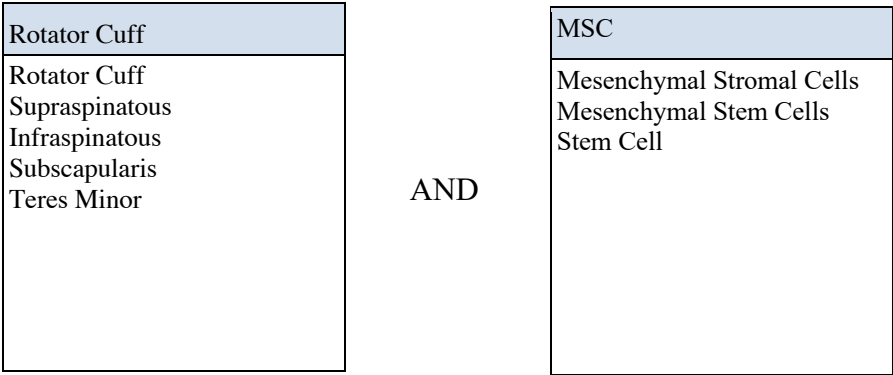

3 **A.**

4

5

6

7 ((((((rotator cuff[MeSH Terms]) OR rotator cuff) OR  
8 supraspinatus) OR infraspinatus) OR subscapularis) OR  
9 teres minor)) AND (((mesenchymal stromal cell[MeSH  
0 Terms]) OR mesenchymal stromal cell) OR mesenchymal  
1 stem cell) OR stem cell)

1

2 **B.**
