# Supplementary material for: Mesenchymal stem cells and their application to rotator cuff pathology: A meta-analysis of pre-clinical studies
Source: PubMed Central journal article supplement — Osteoarthr Cartil Open. 2020 Feb 26;2(2):100047. doi: 10.1016/j.ocarto.2020.100047 (PMC9718136; doi:10.1016/j.ocarto.2020.100047), 2020-02-26
Supplement: mmc4.pdf [file mmc4.pdf]

**Supplementary Table 4: Cell Criteria per Included Studies**

| Study                 | Cell Type                                               | Purchased or Self-isolated? | Plastic Adherence | Positive Markers               | Negative Markers                            | Differentiation capability | Cell expansion media                                                                                                                                                                             | Passage Number |
|-----------------------|---------------------------------------------------------|-----------------------------|-------------------|--------------------------------|---------------------------------------------|----------------------------|--------------------------------------------------------------------------------------------------------------------------------------------------------------------------------------------------|----------------|
| <i>Barco 2014</i>     | Allogenic adipose-derived MSCs                          | Self-isolated               | Yes               | CD73, CD90, CD105              | CD34, CD44                                  | Yes                        | DMEM + 10% FBS + 1% penicillin/streptomycin                                                                                                                                                      | Not Reported   |
| <i>Chen 2015</i>      | Xenogenic human adipose-derived MSCs                    | Purchased                   | Yes               | CD29, CD44, CD73, CD105, CD166 | CD14, CD31, and CD45                        | Not reported               | Keratinocyte-SFM basal medium + 10% FBS + 50 µg/ml bovine pituitary extract + 5 ng/ml human recombinant epidermal growth factor + 2 mM N-acetyl-L-cysteine + 0.2 mM L-ascorbic acid 2-phosphate. | 3              |
| <i>Degan 2016</i>     | Xenogenic human bone marrow-derived MSCs                | Purchased                   | Yes               | CD73, CD90, CD105              | CD11b, CD14, CD19, CD34, CD45, CD79, HLA-DR | Not reported               | ATCC provided MSC basal media + ATCC growth kit for bone marrow-derived MSCs                                                                                                                     | 5              |
| <i>Gullota 2009</i>   | Allogenic bone marrow-derived MSCs                      | Self-isolated               | Yes               | Not reported                   | Not reported                                | Not reported               | DMEM, + 10% FBS + 1% antibiotic-antimycotic                                                                                                                                                      | 3              |
| <i>Kaizawa 2019</i>   | Allogenic "Luciferase-transfected" adipose-derived MSCs | Purchased                   | Yes               | Not Reported                   | Not Reported                                | Not Reported               | Not Reported                                                                                                                                                                                     | 2 and 3        |
| <i>Kim 2017</i>       | Xenogenic human adipose-derived MSCs                    | Self-Isolated               | Yes               | CD40, CD44, SOX-2, TGF-β1      | Not Reported                                | No                         | DMEM + 10% FBS + 1% antibiotic-antimycotic                                                                                                                                                       | Not Reported   |
| <i>Kwon 2018</i>      | Xenogenic human umbilical cord-derived MSCs             | Self-Isolated               | Not Reported      | CD29, CD73, CD90, CD105, CD166 | CD14, CD45, HLA-DR                          | Yes                        | Not Reported                                                                                                                                                                                     | Not Reported   |
| <i>Learn 2018</i>     | Allogenic Bone marrow-derived MSCs                      | Self-Isolated               | Not Reported      | CD44                           | CD45, CD90                                  | Not reported               | DMEM + 10% FBS + 1% penicillin/streptomycin                                                                                                                                                      | 2              |
| <i>Lipner 2015</i>    | Allogenic adipose-derived MSCs                          | Self-isolated               | Yes               | Not reported                   | Not reported                                | Not reported               | Not reported                                                                                                                                                                                     | 3              |
| <i>Liu 2019</i>       | Autologous bone marrow-derived MSCs                     | Self-isolated               | Yes               | Not reported                   | Not reported                                | Not reported               | DMEM + 10% FBS + 1% antibiotic-antimycotic                                                                                                                                                       | 2              |
| <i>Oh 2014</i>        | Allogenic adipose-derived MSCs                          | Self-isolated               | Yes               | Not Reported                   | Not Reported                                | Not Reported               | DMEM + 5% FBS                                                                                                                                                                                    | 3              |
| <i>Omi 2016</i>       | Allogenic bone marrow-derived MSCs                      | Self-isolated               | Yes               | Not Reported                   | Not Reported                                | Not Reported               | DMEM + 10% FBS + 1% antibiotic-antimycotic                                                                                                                                                       | 2 and 3        |
| <i>Park 2015</i>      | Xenogenic human umbilical cord-derived MSCs             | Self-isolated               | Not Reported      | CD29, CD73, CD90, CD105, CD166 | CD14, CD45, HLA-DR                          | Yes                        | Not Reported                                                                                                                                                                                     | Not Reported   |
| <i>Rothrauff 2018</i> | Allogenic adipose-derived MSCs                          | Self-isolated               | Not Reported      | Not Reported                   | Not Reported                                | Yes                        | DMEM + 10% FBS + 1% antibiotic-antimycotic                                                                                                                                                       | 2              |
| <i>Smietana 2017</i>  | Allogenic bone marrow-derived MSCs                      | Self-isolated               | Yes               | Not Reported                   | Not Reported                                | Not Reported               | DMEM + 20% FBS + 2% antibiotic-antimycotic + 600ng/mL bFGF + 40 ng/mL dexamethasone.                                                                                                             | 3 and 4        |
| <i>Tornero 2015</i>   | Allogenic bone marrow-derived MSCs                      | Self-isolated               | Yes               | Not Reported                   | Not Reported                                | Not Reported               | Not Reported                                                                                                                                                                                     | Not Reported   |
| <i>Valencia 2014</i>  | Allogenic adipose-derived MSCs                          | Self-isolated               | Yes               | CD90, CD29, CD45, CD11b        | Not Reported                                | Not Reported               | DMEM + 10% FBS + 1% penicillin/streptomycin                                                                                                                                                      | Not Reported   |
| <i>Yokoya 2012</i>    | Autologous bone marrow-derived MSCs                     | Self-isolated               | Yes               | Not Reported                   | Not Reported                                | No                         | DMEM + 10% FBS + penicillin-streptomycin-amphotericin B + 10 µM bromodeoxyuridine                                                                                                                | Not Reported   |

(FBS) Fetal bovine serum, (DMEM) Dulbecco's Modified Eagle Medium, (MSC) Mesenchymal stem cell
