# Supplementary material for: Mesenchymal stem cells and their application to rotator cuff pathology: A meta-analysis of pre-clinical studies
Source: PubMed Central journal article supplement — Osteoarthr Cartil Open. 2020 Feb 26;2(2):100047. doi: 10.1016/j.ocarto.2020.100047 (PMC9718136; doi:10.1016/j.ocarto.2020.100047), 2020-02-26
Supplement: mmc5.pdf [file mmc5.pdf]

1 **Supplementary Table 5: Stratification of Ultimate Load Failure**

| Variable                                          | # of studies | # of Comparisons | SMD (95% CI)         | % Weight | I <sup>2</sup> s | p*     | p**  |
|---------------------------------------------------|--------------|------------------|----------------------|----------|------------------|--------|------|
| <b>Animal Characteristics</b>                     |              |                  |                      |          |                  |        |      |
| <i>Animal Type</i>                                |              |                  |                      |          |                  |        | 0.03 |
| Rat                                               | 11           | 23               | -0.31 (-0.55, -0.07) | 82.30%   | 47%              | 0.007  |      |
| Rabbit                                            | 3            | 4                | -0.84 (-1.43, -0.25) | 13.20%   | 46%              | 0.14   |      |
| Canine                                            | 1            | 1                | -1.44 (-2.45, -0.43) | 4.50%    | N/A              | N/A    |      |
| <b>Stem Cell Characteristics</b>                  |              |                  |                      |          |                  |        |      |
| <i>Source</i>                                     |              |                  |                      |          |                  |        | 0.08 |
| Adipose                                           | 8            | 16               | -0.27 (-0.55, 0.01)  | 58.40%   | 27%              | 0.15   |      |
| Bone Marrow                                       | 7            | 12               | -0.66 (-0.99, -0.32) | 41.60%   | 64%              | 0.001  |      |
| <i>Origin</i>                                     |              |                  |                      |          |                  |        | 0.1  |
| Allogenic                                         | 10           | 18               | -0.31 (-0.57, -0.05) | 67.30%   | 30%              | 0.11   |      |
| Autologous                                        | 2            | 3                | -1.05 (-1.66, -0.44) | 12.20%   | 68%              | 0.04   |      |
| Xenogenic                                         | 3            | 7                | -0.45 (-0.92, 0.03)  | 20.40%   | 68%              | 0.005  |      |
| <i>Dose</i>                                       |              |                  |                      |          |                  |        | 0.09 |
| ≤1 Million cells                                  | 8            | 13               | -0.70 (-1.03, -0.38) | 42.90%   | 36%              | 0.1    |      |
| >1 Million cells                                  | 5            | 11               | -0.28 (-0.64, 0.09)  | 35%      | 57%              | 0.009  |      |
| Not reported                                      | 2            | 4                | -0.14 (-0.60, 0.31)  | 22.10%   | 57%              | 0.07   |      |
| <b>Experimental Characteristics</b>               |              |                  |                      |          |                  |        |      |
| <i>RCI Model</i>                                  |              |                  |                      |          |                  |        | 0.8  |
| Intervention given ≤ 3 days after model creation  | 11           | 20               | -0.45 (-0.72, -0.18) | 63.80%   | 58%              | 0.0006 |      |
| Intervention given 4-8 weeks after model creation | 5            | 8                | -0.39 (-0.75, -0.04) | 36.20%   | 18%              | 0.29   |      |
| Both                                              |              |                  |                      |          |                  |        |      |
| <i>Delivery Method</i>                            |              |                  |                      |          |                  |        | 1    |
| Direct Application                                | 3            | 6                | -0.43 (-0.90, 0.04)  | 20.60%   | 71%              | 0.004  |      |
| Scaffold                                          | 13           | 22               | -0.43 (-0.67, -0.19) | 79.40%   | 43%              | 0.02   |      |
| <i>Timing of assessment</i>                       |              |                  |                      |          |                  |        | 0.13 |
| ≤ 2 weeks post repair                             | 4            | 7                | -0.32 (-0.79, 0.15)  | 20.70%   | 66%              | 0.007  |      |
| > 2weeks and ≤ 4 weeks                            | 8            | 9                | -0.19 (-0.55, 0.18)  | 34.40%   | 0%               | 0.98   |      |
| > 4 weeks post repair                             | 10           | 12               | -0.67 (-0.99, -0.35) | 45%      | 63%              | 0.002  |      |

2 Note: P\* value for subgrouping difference; p\*\* value for heterogeneity between subgroups
