# Supplementary material for: Mesenchymal stem cells and their application to rotator cuff pathology: A meta-analysis of pre-clinical studies
Source: PubMed Central journal article supplement — Osteoarthr Cartil Open. 2020 Feb 26;2(2):100047. doi: 10.1016/j.ocarto.2020.100047 (PMC9718136; doi:10.1016/j.ocarto.2020.100047), 2020-02-26
Supplement: mmc7.pdf [file mmc7.pdf]

# 1 Supplementary Figure 1A-G: Stratified Analysis of Ultimate Load Failure

## 2 1A: MSC Source

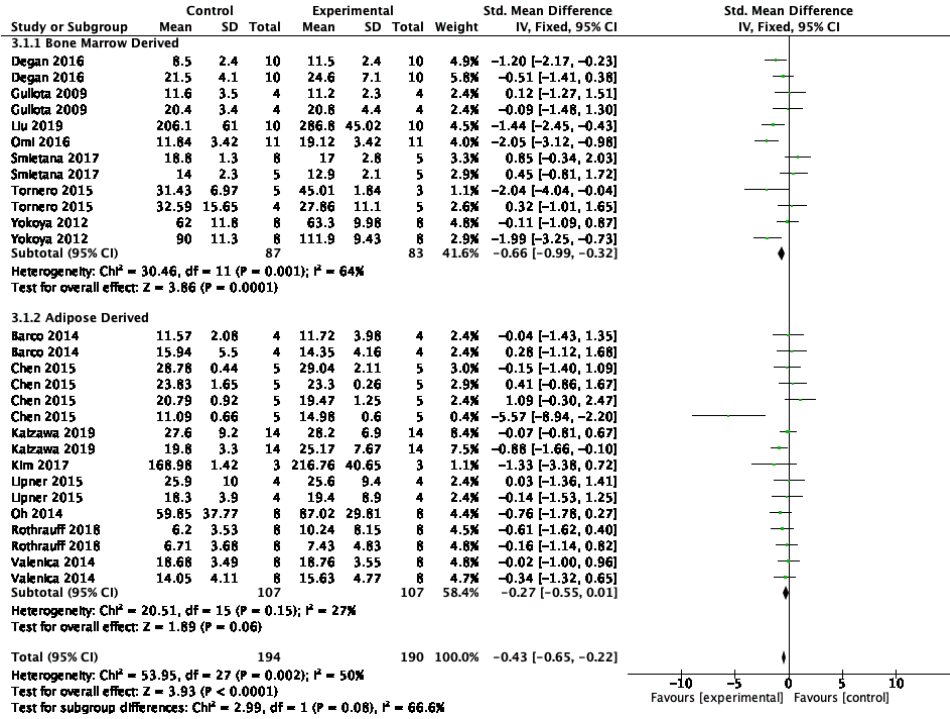

3

## 4 1B: MSC Origin

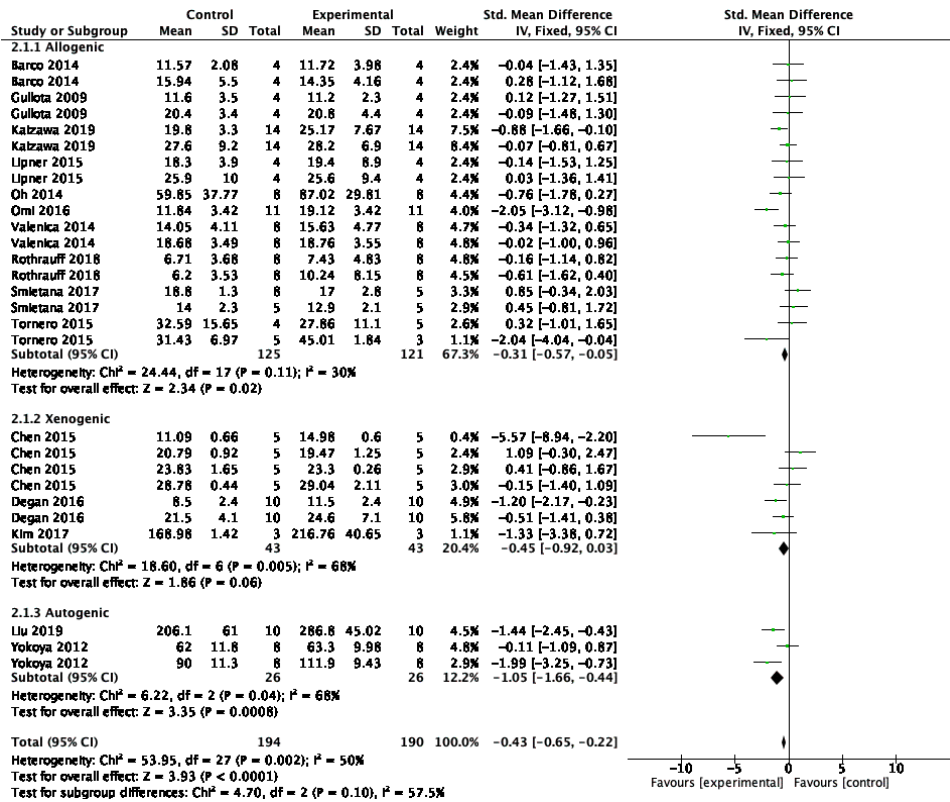

5

# 1 IC: MSC Dose

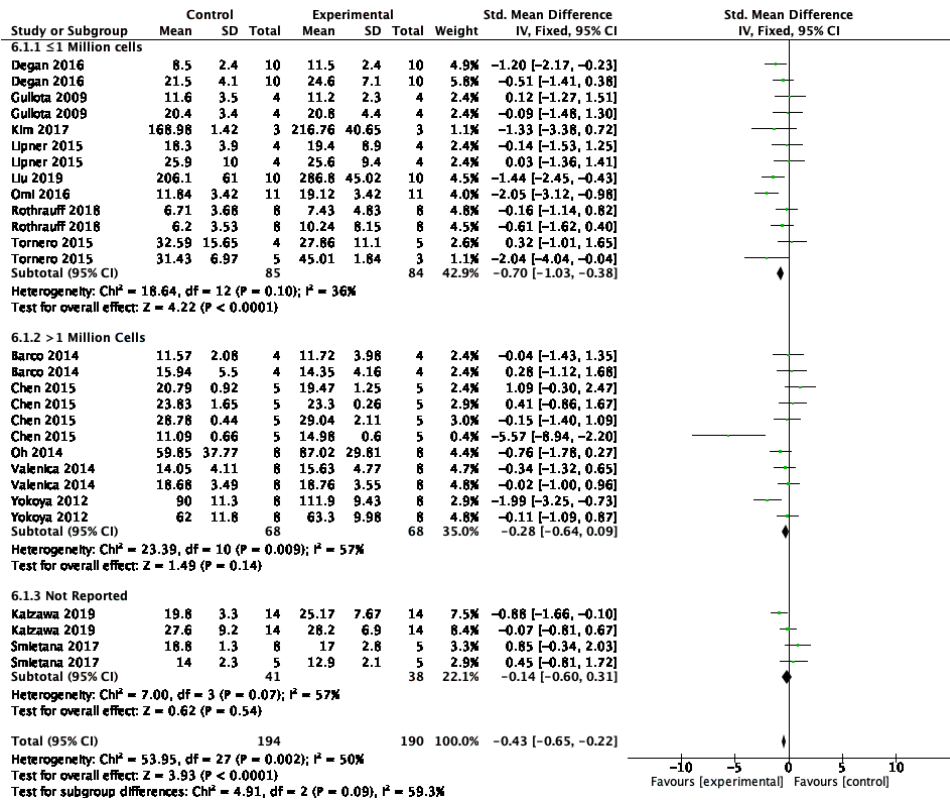

2

# 3 1D: Timing of Administration

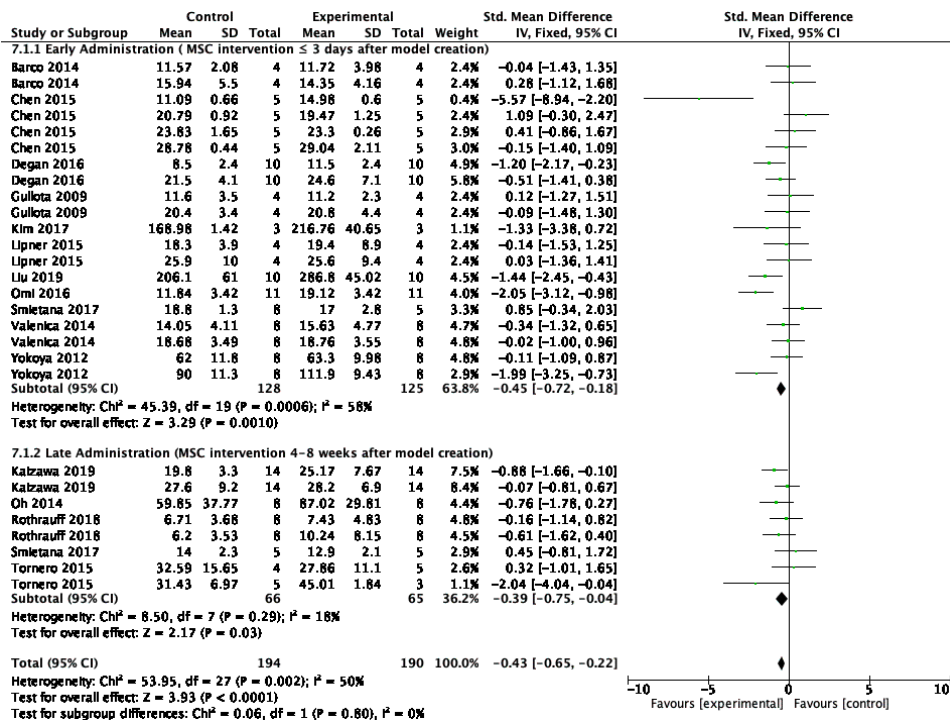

4

# 1 1E: Timing of Biomechanical Assessment

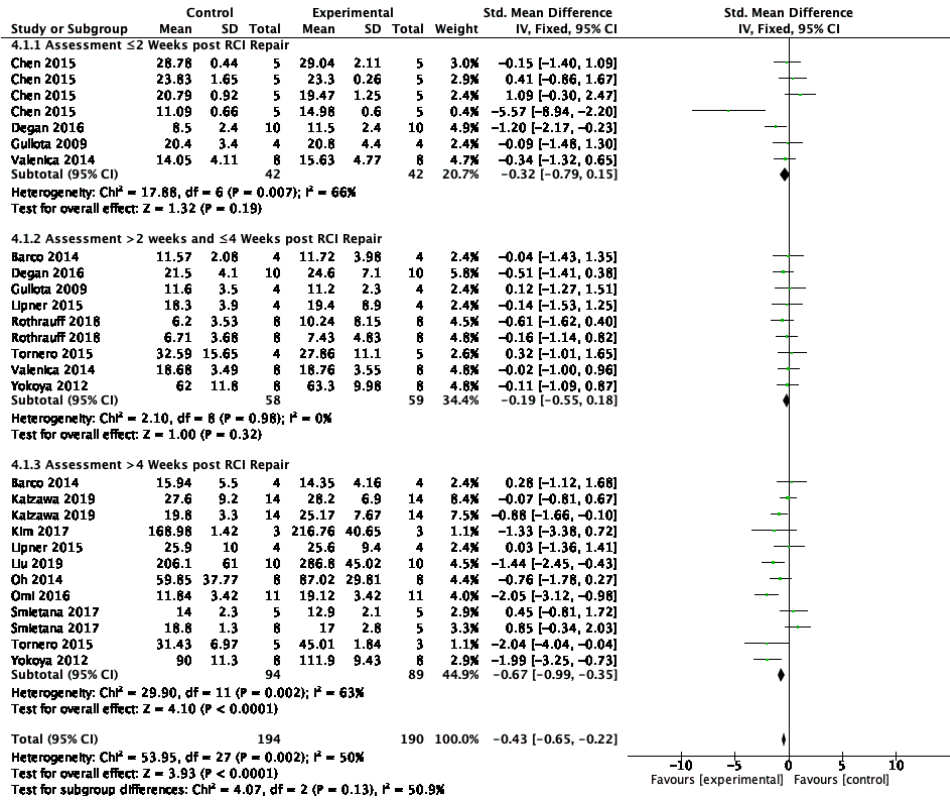

2

# 3 1F: Animal Model

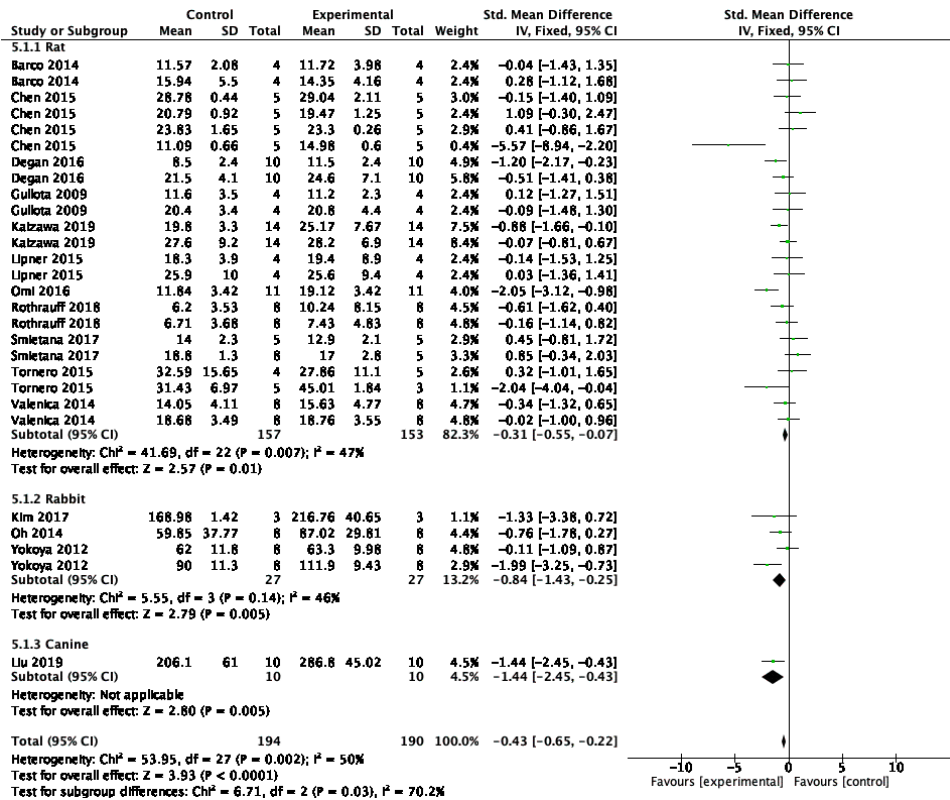

4

1 1G: Scaffold vs. Scaffold-less

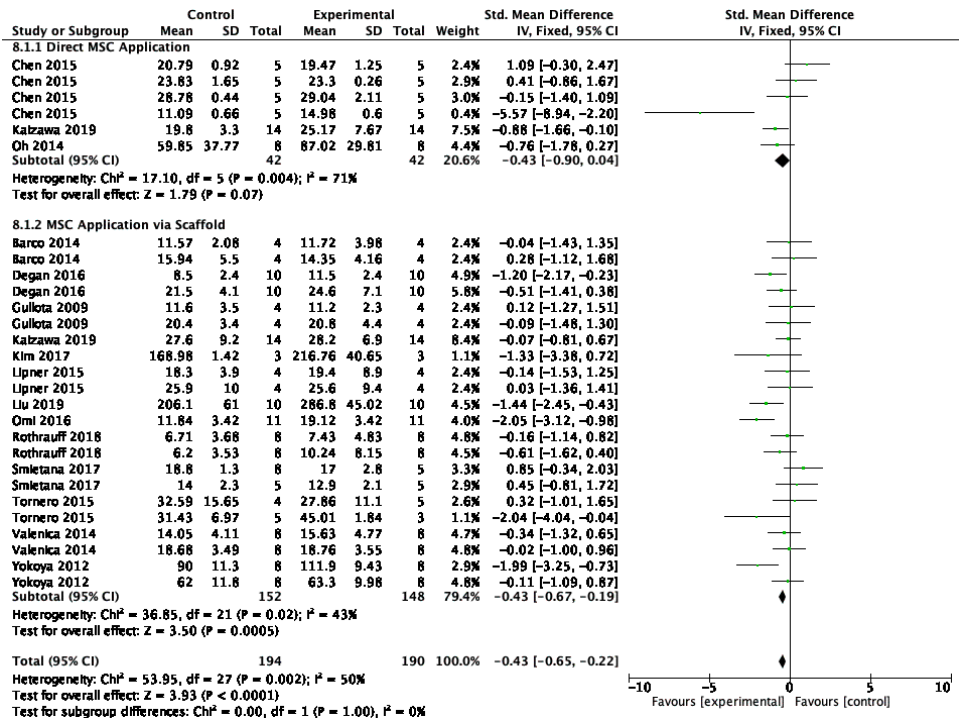

2
